# Supplementary material for: Genome-wide Identification and Characterization of a Superfamily of Bacterial Extracellular Contractile Injection Systems
Source: PubMed Central journal article supplement — Cell Rep. 2019 Oct 8;29(2):511–521.e2. doi: 10.1016/j.celrep.2019.08.096 (PMC6899500; doi:10.1016/j.celrep.2019.08.096), 2019-10-08
Supplement: mmc1.pdf [file mmc1.pdf]

**Cell Reports, Volume 29**

## **Supplemental Information**

### **Genome-wide Identification and Characterization of a Superfamily of Bacterial Extracellular Contractile Injection Systems**

**Lihong Chen, Nan Song, Bo Liu, Nan Zhang, Nabil-Fareed Alikhan, Zhemin Zhou, Yanyan Zhou, Siyu Zhou, Dandan Zheng, Mingxing Chen, Alexia Hapeshi, Joseph Healey, Nicholas R. Waterfield, Jian Yang, and Guowei Yang**

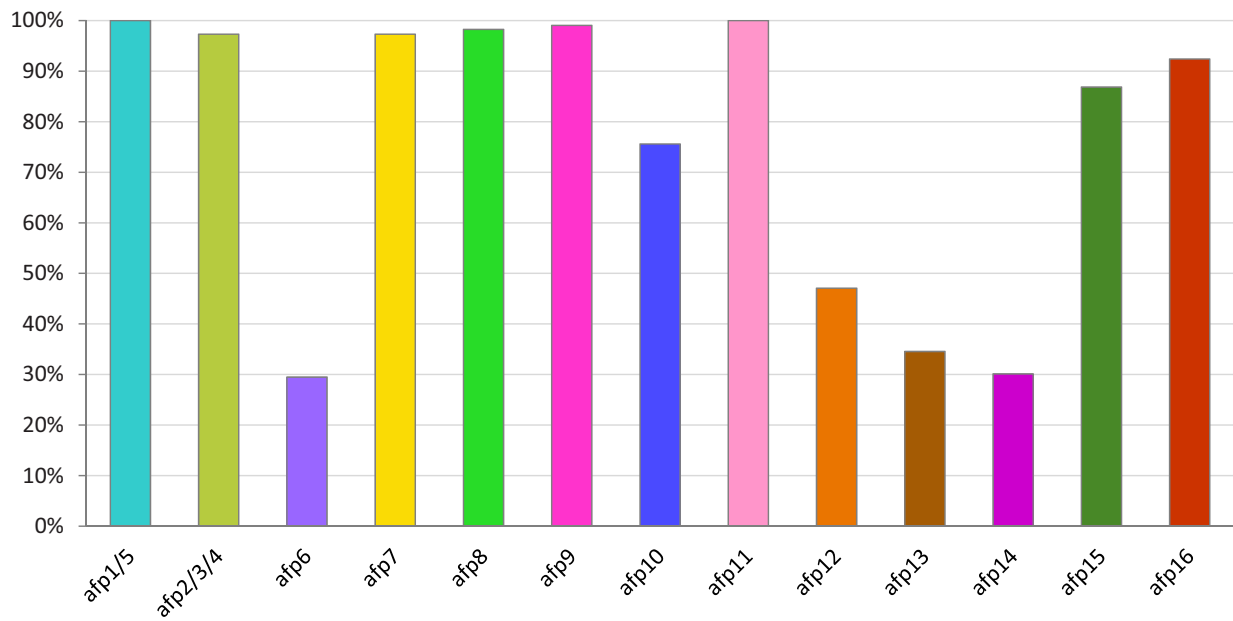

**Figure S1. Proportion of eCIS-like loci encoding each of recognized eCIS subunit components, related to Figure 2.** A column chart of the proportion of loci that encode each of the known component subunits among all 631 loci. Multiple copies within the same loci are counted only once. The color code is consistent with that used in Figure 1.

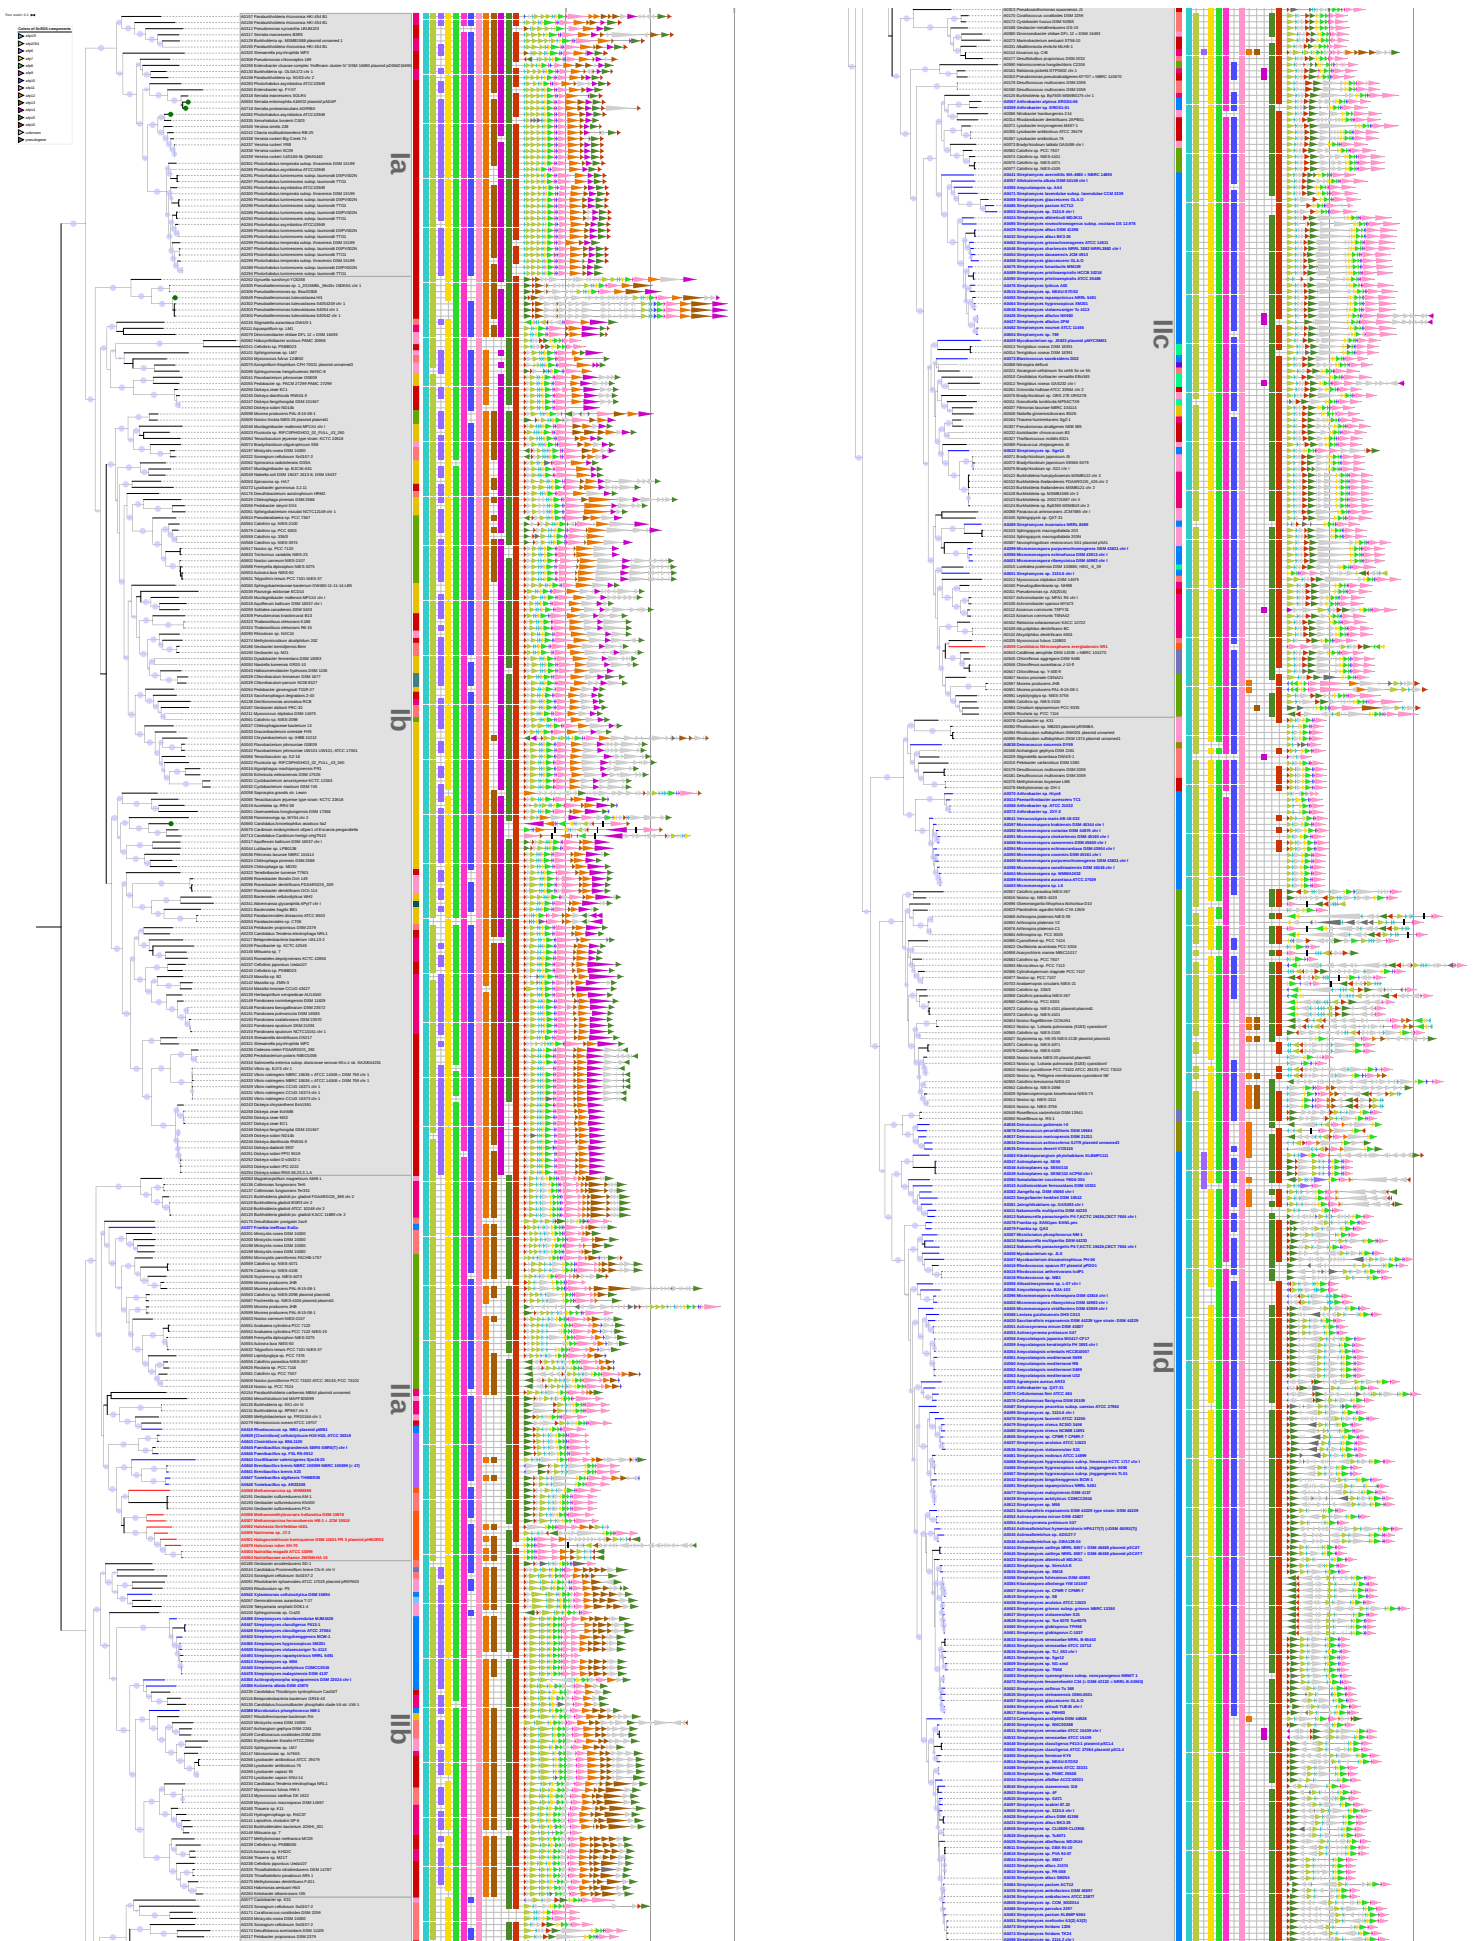

**Figure S2. The detailed phylogenetic tree of the 631 eCIS-like loci.** Bootstrap values are indicated with proportional light purple bubbles on individual branches. Loci derived from archaeal and Gram-positive bacterial genomes are highlighted with red and blue branches, respectively. Previously reported eCIS loci are indicated by solid green circles at the leaf. The dbcCIS ID of each eCIS-like loci is provided before the genome name. The subtypes are highlighted with grey background shadows. The left-most colored bar denote the taxonomic groups using the same schema as Figure 3. The 13 colored squares after each node indicate the presence and absence of the known eCIS components in each locus with the same color code as Figure 1. Detailed genetic organization of each locus is provided as right-most schematic linear map (to scale).

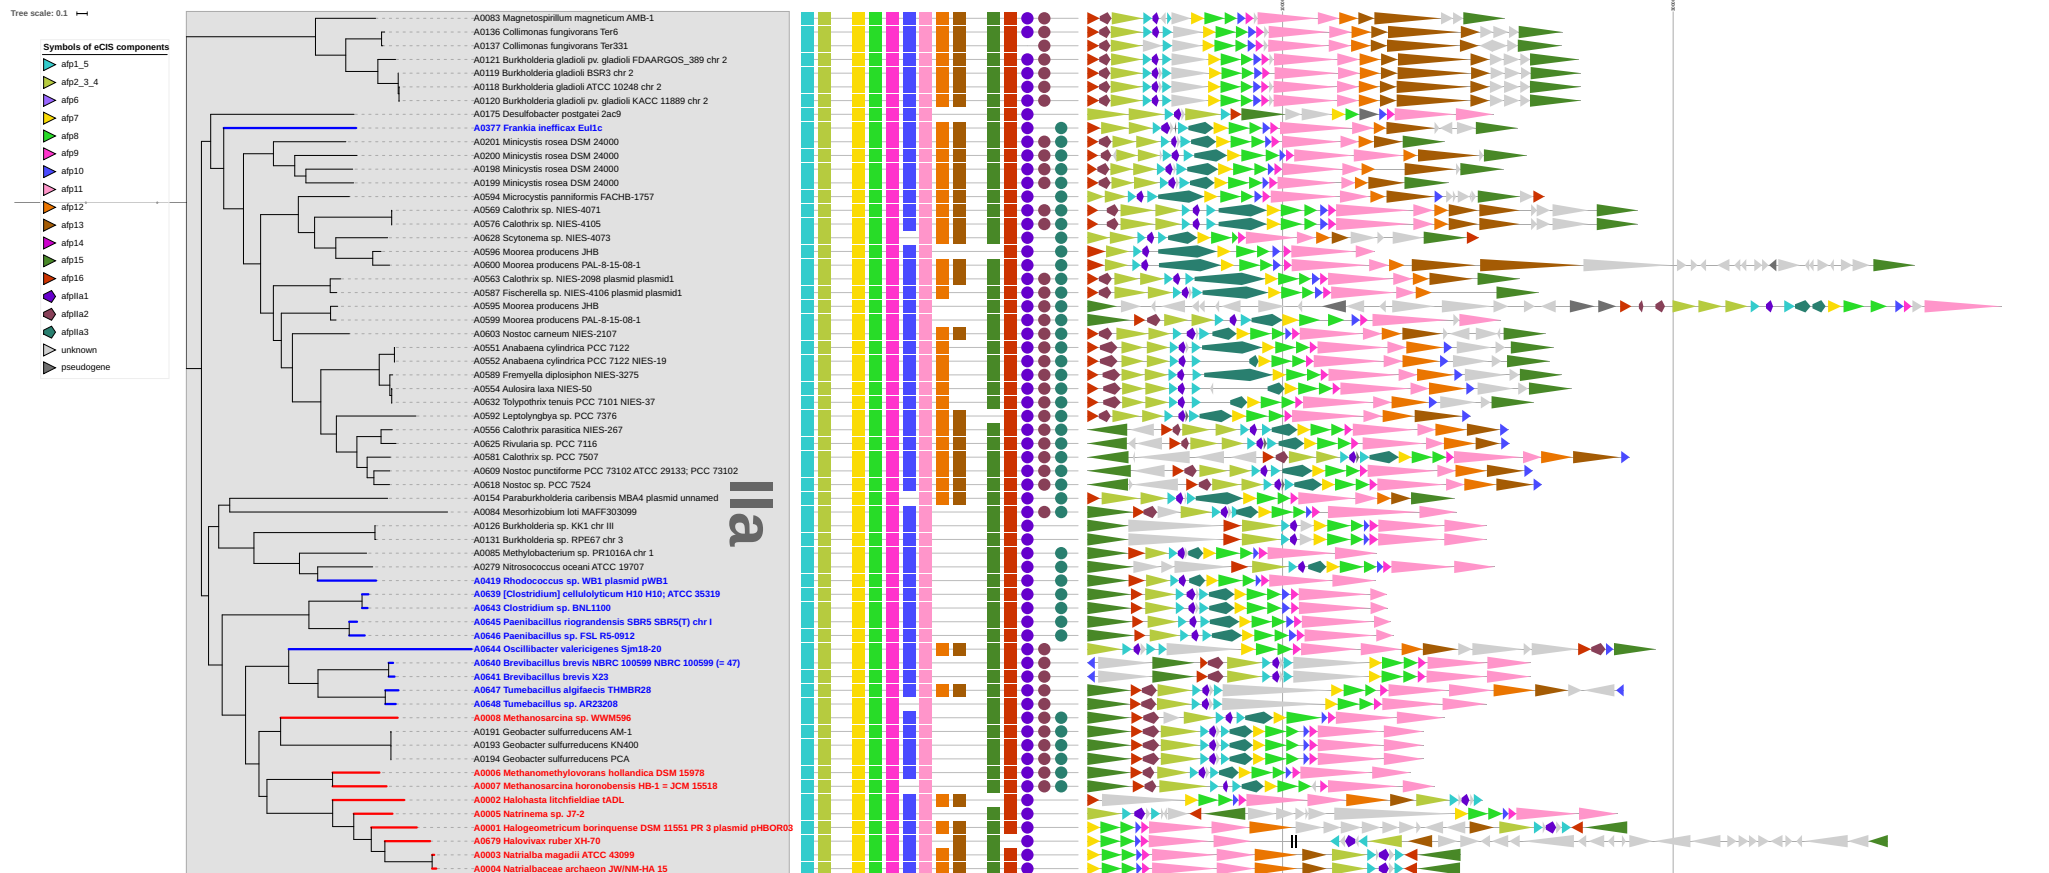

**Figure S3. The detailed sub-tree of subtype IIa, related to Figure 4.** Internal conserved genes are denoted as colored solid circles after the known components squares and highlighted as colored pentagon within the right-most linear map.

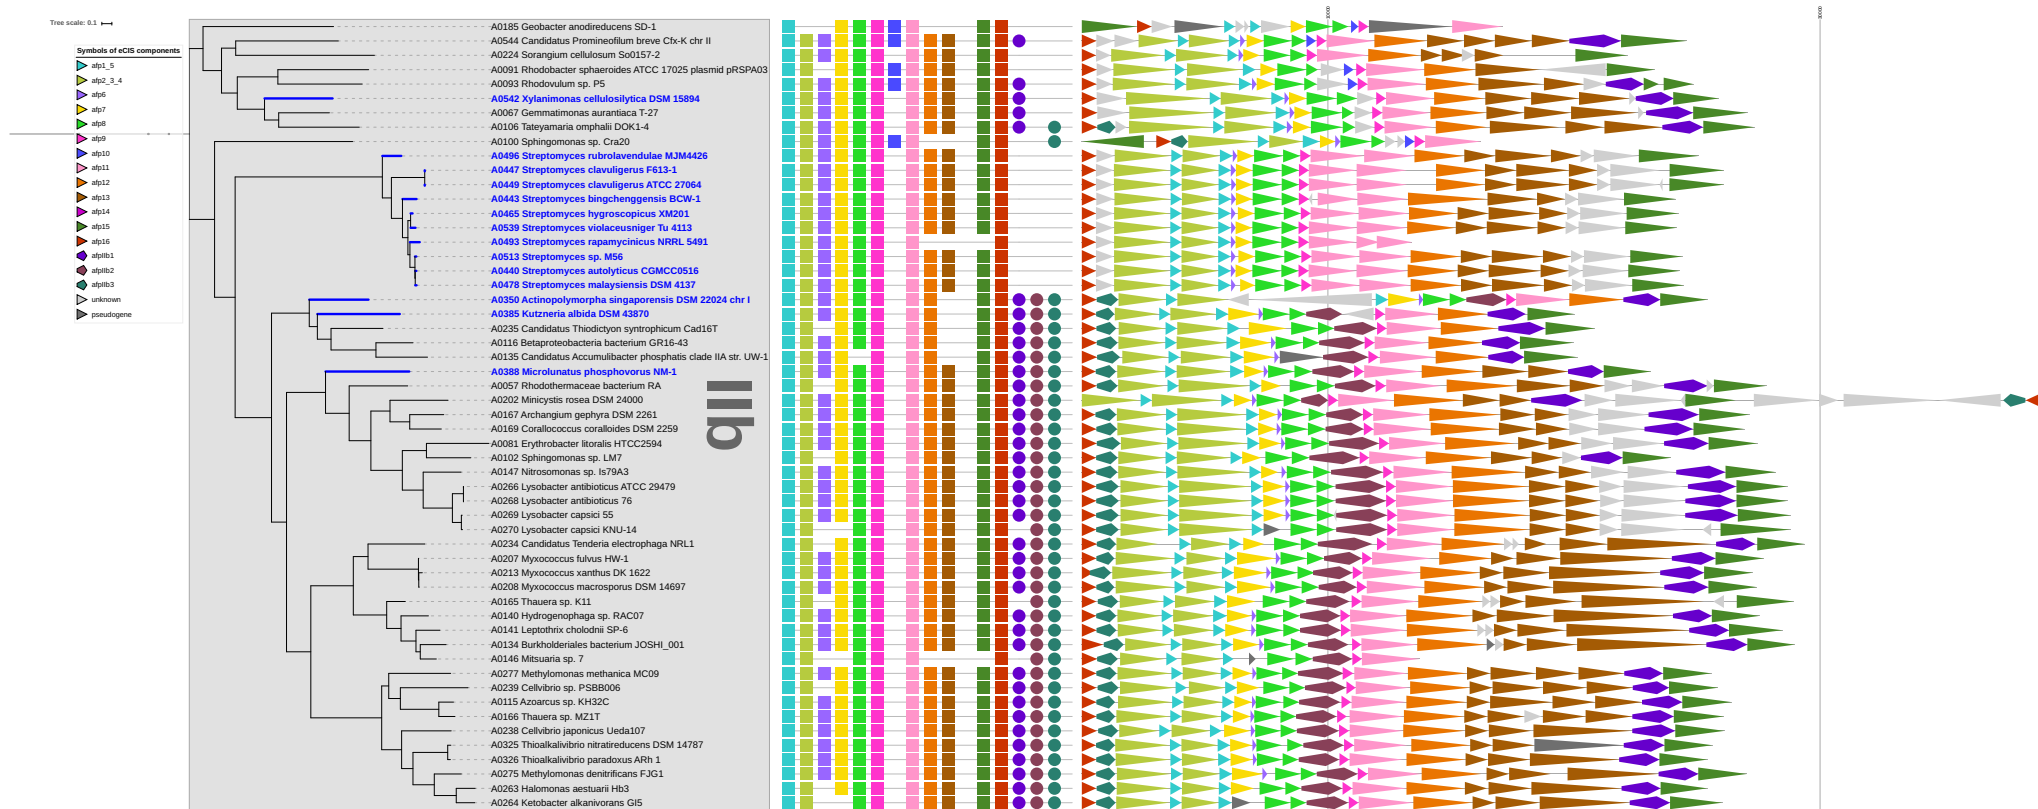

**Figure S4.** The detailed sub-tree of subtype IIb, related to Figure 4. Internal conserved genes are denoted as colored solid circles after the known components squares and highlighted as colored pentagram within the right-most linear map.

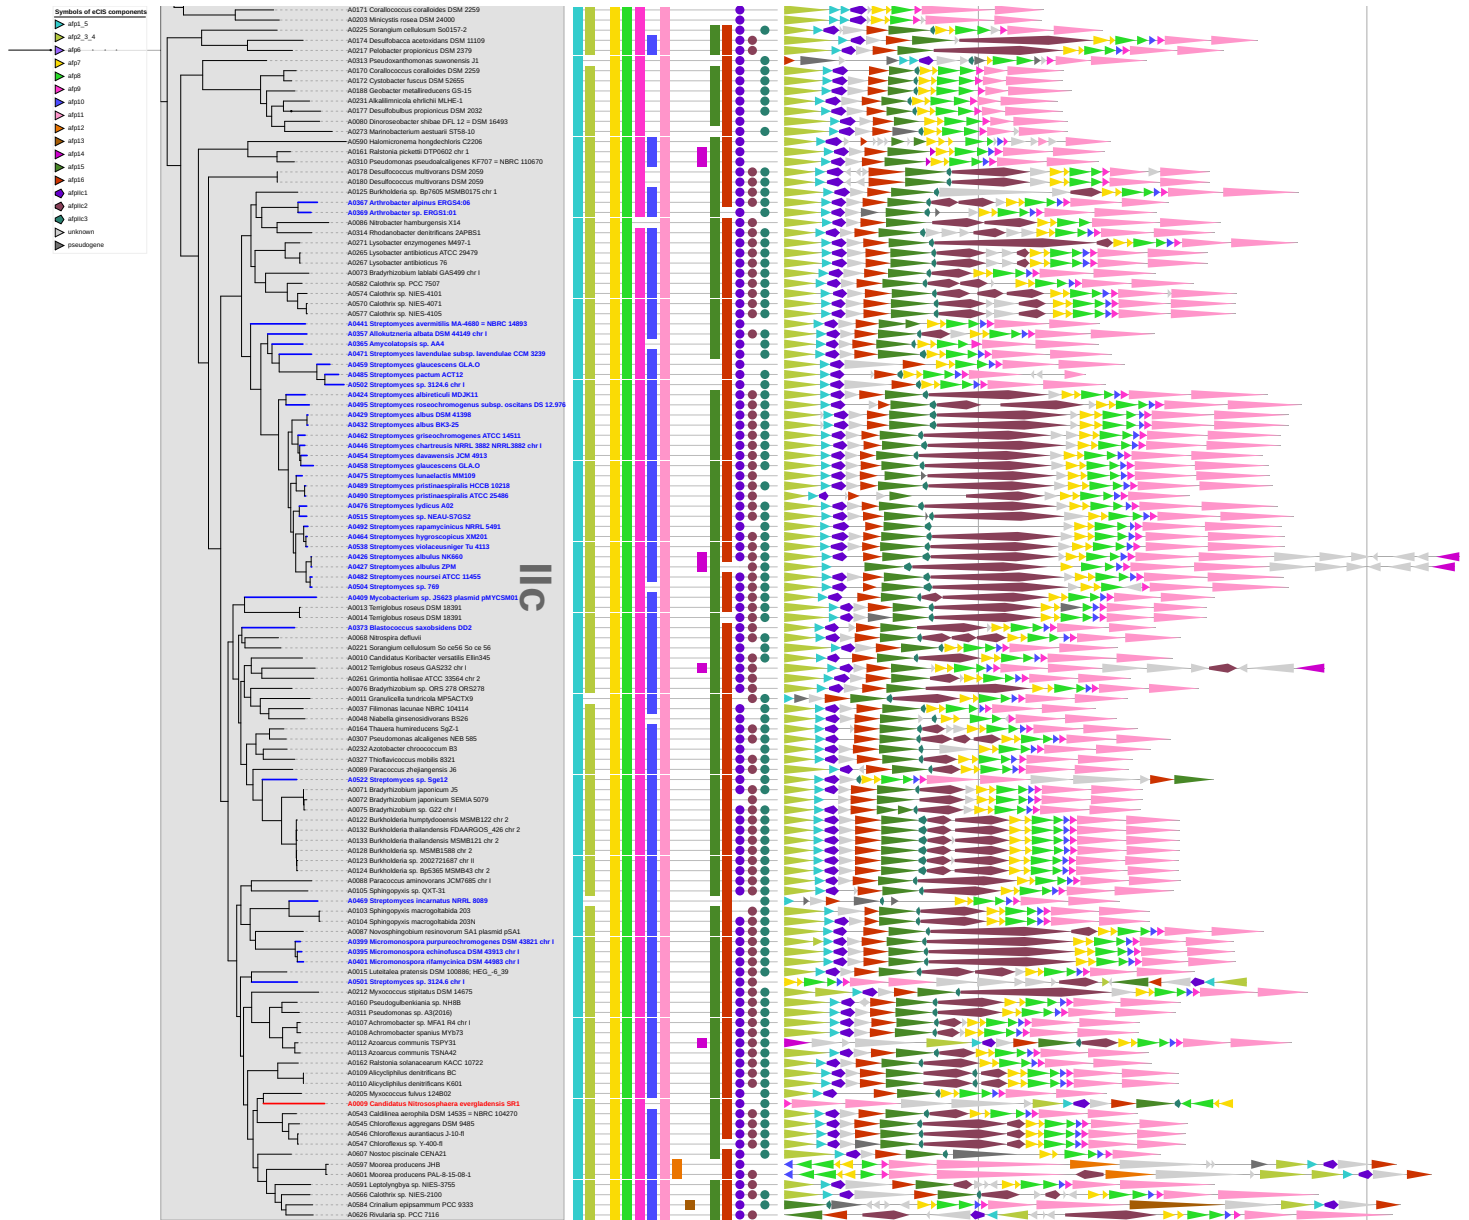

**Figure S5.** The detailed sub-tree of subtype IIc, related to Figure 4. Internal conserved genes are denoted as colored solid circles after the known components squares and highlighted as colored pentagram within the right-most linear map.

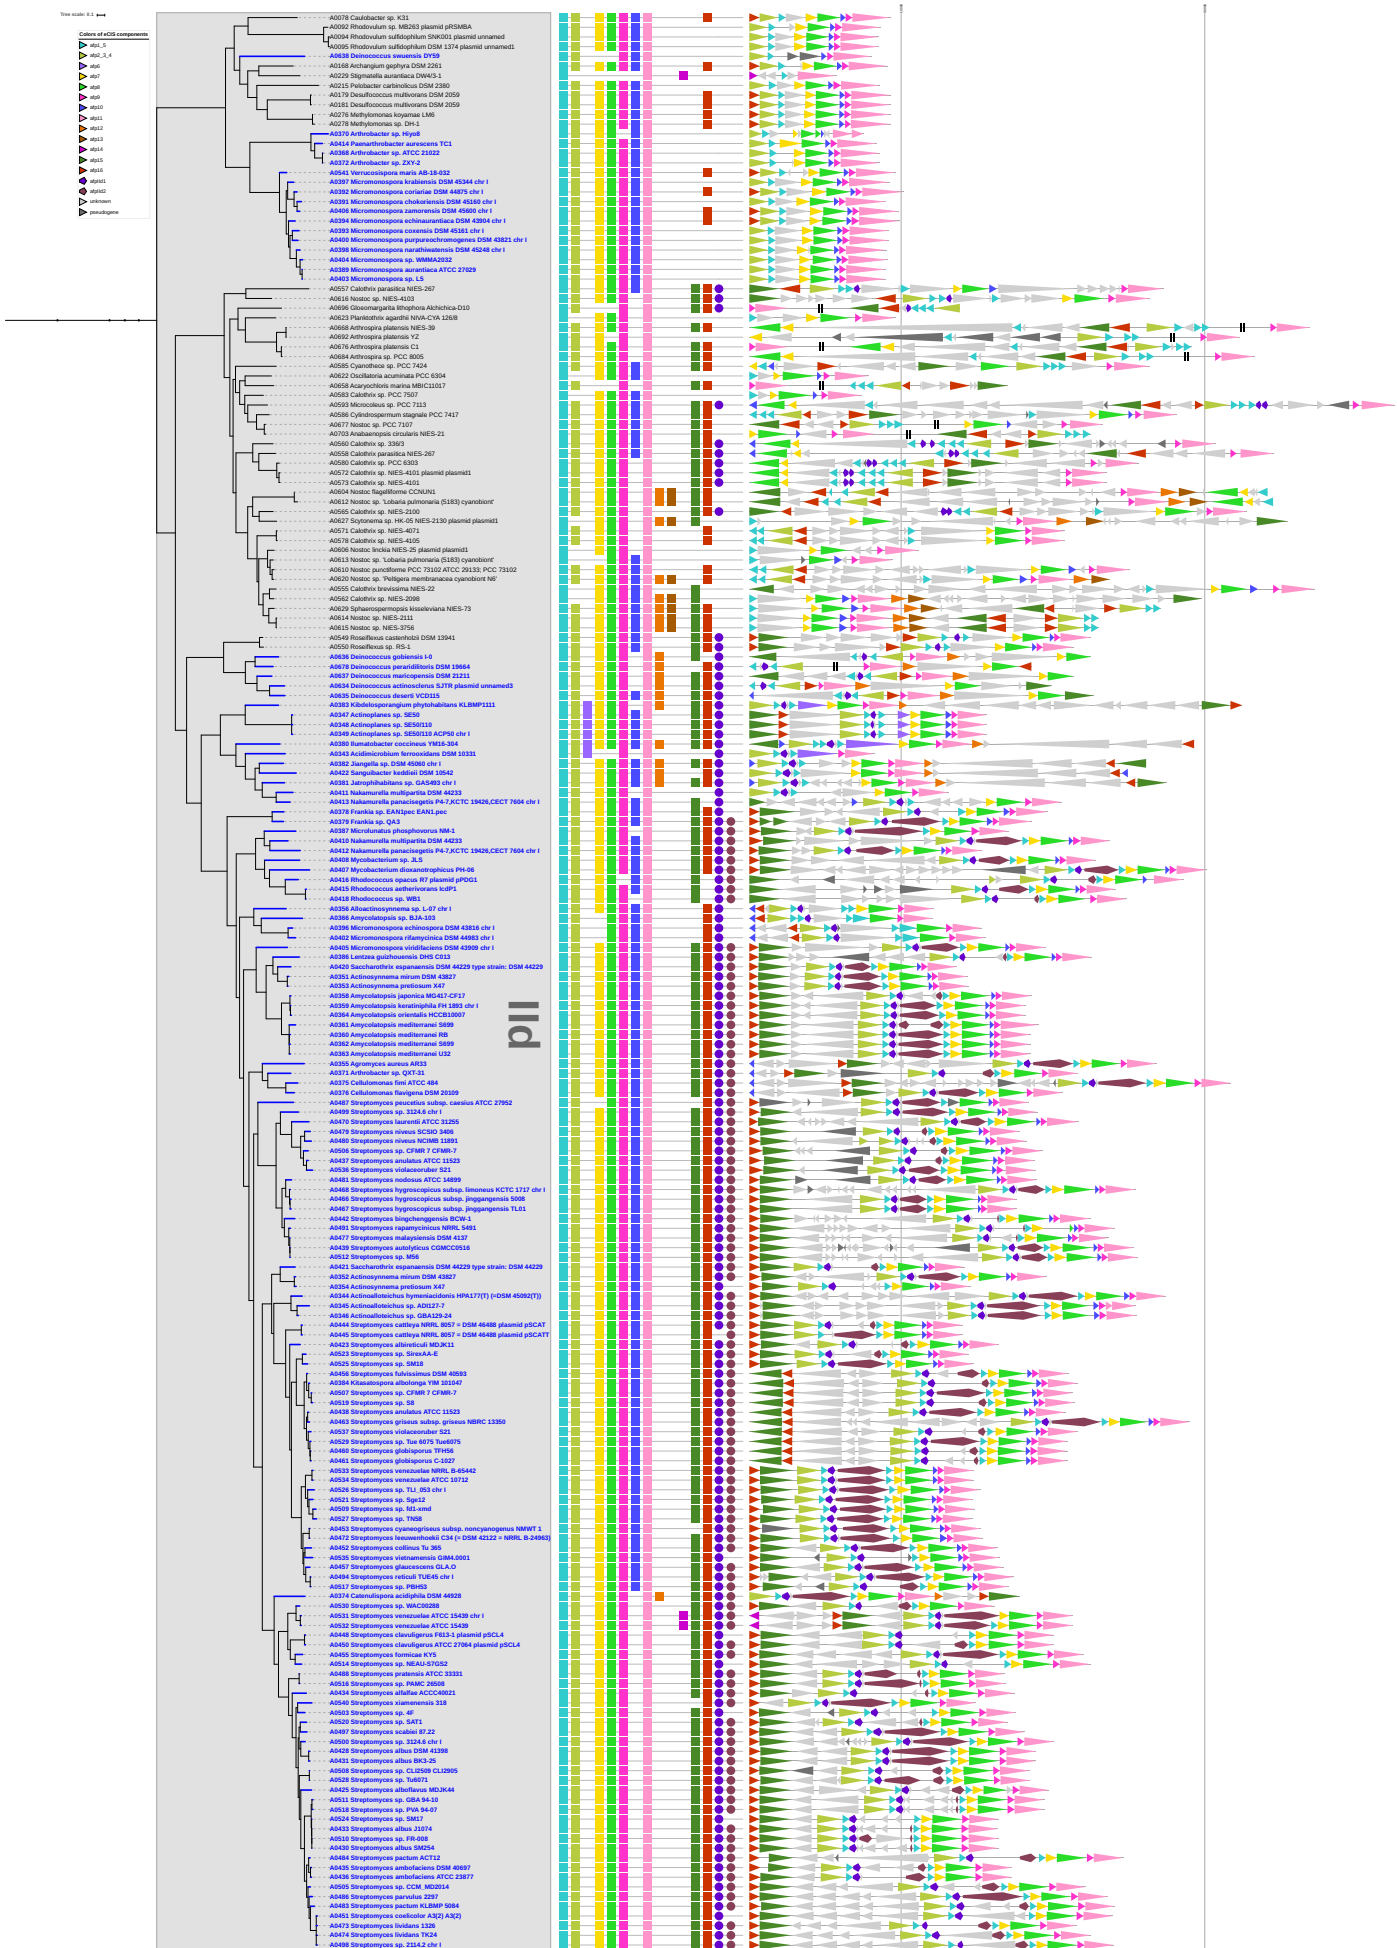

**Figure S6.** The detailed sub-tree of subtype IId, related to Figure 4. Internal conserved genes are denoted as colored solid circles after the known components squares and highlighted as colored pentagram within the right-most linear map.

## *Salmonella enterica* subsp. *diarizonae* serovar 65:c:z str. SA20044251

- **Taxonomy classification**
  - Kingdom: Bacteria
  - Phylum: Proteobacteria
  - Class: Gammaproteobacteria
  - Order: Enterobacteriales
  - Family: Enterobacteriaceae
  - Genus: Salmonella
  - Species: Salmonella enterica
- **Gram stain:** negative
- **Genome project:** [PRJNA177620](#)
- **Genome size:** 5,06609 Mbp
- **Genome GC content:** 51.4584%
- **Replicon:** [Salmonella enterica subsp. diarizonae serovar 65:c:z str. SA20044251 chromosome, complete genome](#) (4913978 bp)
- **Collection date:** 1993/3/11
- **Serovar:** 65:c:z
- **Location:** Canada: Ontario: Guelph
- **Sub species:** diarizonae
- **Strain:** SA20044251
- **Publication:** Robertson, J., Yoshida, C., Gurnik, S. and Nash, J. *Unpublished*.
- **Related links:** [Taxonomy](#)
- **eCIS locus (lineage lb):** [A0316](#) (25094 bp) ==>>

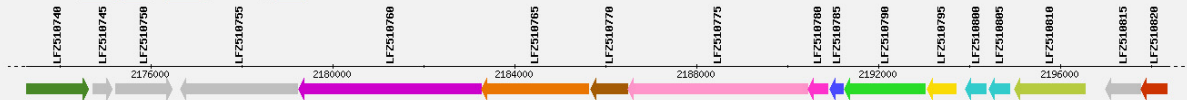

| Component | Gene ID  | Genome location | Strand           | Gene | Protein ID | Product (original annotation) |                               |
|-----------|----------|-----------------|------------------|------|------------|-------------------------------|-------------------------------|
| 1         | afp15    | LEZ55_10740     | 2173249..2174622 | +    | -          | <a href="#">ASG83374.1</a>    | AAA family ATPase             |
| 2         | -        | LEZ55_10745     | 2174710..2175144 | +    | -          | <a href="#">ASG83375.1</a>    | hypothetical protein          |
| 3         | -        | LEZ55_10750     | 2175225..2176478 | +    | -          | <a href="#">ASG83376.1</a>    | hypothetical protein          |
| 4         | -        | LEZ55_10755     | 2176629..2179223 | -    | -          | <a href="#">ASG83377.1</a>    | hypothetical protein          |
| 5         | afp14    | LEZ55_10760     | 2179235..2183266 | -    | -          | <a href="#">ASG83378.1</a>    | hypothetical protein          |
| 6         | afp12    | LEZ55_10765     | 2183263..2185641 | -    | -          | <a href="#">ASG83379.1</a>    | hypothetical protein          |
| 7         | afp13    | LEZ55_10770     | 2185650..2186480 | -    | -          | <a href="#">ASG83380.1</a>    | hypothetical protein          |
| 8         | afp11    | LEZ55_10775     | 2186473..2190444 | -    | -          | <a href="#">ASG83381.1</a>    | hypothetical protein          |
| 9         | afp9     | LEZ55_10780     | 2190444..2190893 | -    | -          | <a href="#">ASG83382.1</a>    | hypothetical protein          |
| 10        | afp10    | LEZ55_10785     | 2190923..2191222 | -    | -          | <a href="#">ASG83383.1</a>    | type VI secretion protein     |
| 11        | afp8     | LEZ55_10790     | 2191242..2193035 | -    | -          | <a href="#">ASG83384.1</a>    | Rhs element Vgr protein       |
| 12        | afp7     | LEZ55_10795     | 2193050..2193703 | -    | -          | <a href="#">ASG83385.1</a>    | peptidoglycan-binding protein |
| 13        | afp1/5   | LEZ55_10800     | 2193902..2194378 | -    | -          | <a href="#">ASG83386.1</a>    | phage tail protein            |
| 14        | afp1/5   | LEZ55_10805     | 2194428..2194898 | -    | -          | <a href="#">ASG83387.1</a>    | phage tail protein            |
| 15        | afp2/3/4 | LEZ55_10810     | 2194977..2196536 | -    | -          | <a href="#">ASG83388.1</a>    | phage tail protein            |
| 16        | -        | LEZ55_10815     | 2196975..2197757 | -    | -          | <a href="#">ASG83389.1</a>    | hypothetical protein          |
| 17        | afp16    | LEZ55_10820     | 2197758..2198342 | -    | -          | <a href="#">ASG83390.1</a>    | hypothetical protein          |

[<<Back](#)

[<Top](#)

[Mode>>](#)

**Figure S7. Snapshot of dbeCIS information for an example locus, related to STAR Methods.** An example of dbeCIS webpage to present the taxonomy, bacterial characteristics, genomic features, related publications and the clickable linear map of an eCIS-like locus.



**Table S2.** Microorganisms, including Gram-negative/positive bacteria and Archaea, encode “split” eCIS-like loci within their genomes, related to Figure 2.

| eCIS ID* | Genome                                          | Kingdom  | Phylum              | Family             | Gram | eCIS Subtype |
|----------|-------------------------------------------------|----------|---------------------|--------------------|------|--------------|
| A0679    | <i>Halovivax ruber</i> XH-70                    | Archaea  | Euryarchaeota       | Natrialbaeaceae    |      | Ia           |
| A0660    | <i>Amoebophilus asiaticus</i> 5a2 <sup>§</sup>  | Bacteria | Bacteroidetes       | Amoebophilaceae    | -    | Ib           |
| A0675    | <i>Cardinium hertigii</i> cEper1                | Bacteria | Bacteroidetes       | Amoebophilaceae    | -    | Ib           |
| A0713    | <i>Cardinium hertigii</i> cHgTN10               | Bacteria | Bacteroidetes       | Amoebophilaceae    | -    | Ib           |
| A0658    | <i>Acaryochloris marina</i> MBIC11017           | Bacteria | Cyanobacteria       | Acaryochloridaceae | -    | IId          |
| A0703    | <i>Anabaenopsis circularis</i> NIES-21          | Bacteria | Cyanobacteria       | Aphanizomenonaceae | -    | IId          |
| A0696    | <i>Gloeomargarita lithophora</i> Alchichica-D10 | Bacteria | Cyanobacteria       | Gloeomargaritaceae | -    | IId          |
| A0668    | <i>Arthrospira platensis</i> NIES-39            | Bacteria | Cyanobacteria       | Microcoleaceae     | -    | IId          |
| A0676    | <i>Arthrospira platensis</i> C1                 | Bacteria | Cyanobacteria       | Microcoleaceae     | -    | IId          |
| A0684    | <i>Arthrospira sp.</i> PCC 8005                 | Bacteria | Cyanobacteria       | Microcoleaceae     | -    | IId          |
| A0692    | <i>Arthrospira platensis</i> YZ                 | Bacteria | Cyanobacteria       | Microcoleaceae     | -    | IId          |
| A0677    | <i>Nostoc sp.</i> PCC 7107                      | Bacteria | Cyanobacteria       | Nostocaceae        | -    | IId          |
| A0678    | <i>Deinococcus peraridilitoris</i> DSM 19664    | Bacteria | Deinococcus-Thermus | Deinococcaceae     | +    | IId          |

Note: \*, eCIS IDs available from the dbCIS database; §, experimentally verified (Bock et al. 2017).

**Table S5.** Organisms encoding both classical T6SS and eCIS-like loci, related to Figure 6.

| Organism                                   | Accession | T6SS ID*   | Completeness of T6SS components                         | eCIS ID# | eCIS Lineage |
|--------------------------------------------|-----------|------------|---------------------------------------------------------|----------|--------------|
| <i>Alkalilimnicola ehrlichii</i> MLHE-1    | NC_008340 | 145        | no TssH                                                 | A0231    | IIc          |
| <i>Azoarcus</i> sp. KH32C                  | NC_020516 | 736        | no TssI                                                 | A0115    | IIb          |
| <i>Burkholderia gladioli</i> BSR3          | NC_015381 | 433        | no TssI                                                 | A0119    | IIa          |
|                                            | NC_015376 | 430        | no TssJ                                                 |          |              |
|                                            | NC_015383 | <b>434</b> |                                                         |          |              |
| <i>Burkholderia thailandensis</i> MSMB121  | NC_021173 | 758        | no TssI                                                 | A0133    | IIc          |
|                                            | NC_021174 | <b>761</b> |                                                         |          |              |
|                                            |           | <b>762</b> |                                                         |          |              |
|                                            |           | <b>760</b> |                                                         |          |              |
|                                            |           | <b>759</b> |                                                         |          |              |
| <i>Chitinophaga pinensis</i> DSM 2588      | NC_013132 | 912        | no TssI, TssM                                           | A0024    | Ib           |
|                                            |           | 913        | no TssM                                                 | A0025    |              |
| <i>Collimonas fungivorans</i> Ter331       | NC_015856 | <b>455</b> |                                                         | A0137    | IIa          |
| <i>Coralloccoccus coralloides</i> DSM 2259 | NC_017030 | 558        | no TssH, TssD, TssI, TssA, TssG, TssJ                   | A0169    | IIb          |
|                                            |           |            |                                                         | A0170    | IIc          |
|                                            |           |            |                                                         | A0171    |              |
| <i>Dechloromonas aromatica</i> RCB         | NC_007298 | <b>87</b>  |                                                         | A0138    | Ib           |
| <i>Dickeya chrysanthemi</i> Ech1591        | NC_012912 | 351        | no TssI, TssD                                           | A0243    | Ib           |
| <i>Dickeya dadantii</i> 3937               | NC_014500 | 409        | no TssI, TssD                                           | A0244    | Ib           |
| <i>Dickeya zeae</i> Ech586                 | NC_013592 | 373        | no TssI, TssD                                           | A0258    | Ib           |
| <i>Dyadobacter fermentans</i> DSM 18053    | NC_013037 | 911        | no TssM, TssO, TssP                                     | A0034    | Ib           |
| <i>Flavobacterium johnsoniae</i> UW101     | NC_009441 | 910        | no TssM                                                 | A0042    | Ib           |
| <i>Gemmatimonas aurantiaca</i> T-27        | NC_012489 | 332        | no TssJ                                                 | A0067    | IIb          |
| <i>Geobacter bemidjensis</i> Bem           | NC_011146 | 296        | no TssH                                                 | A0186    | Ib           |
| <i>Geobacter metallireducens</i> GS-15     | NC_007517 | 107        | no TssH, TssE, TssF, TssG, TssJ, TssK                   | A0188    | IIc          |
|                                            |           | 108        | no TssD, TssL, TssI, TssA, TssB, TssC, TssM             |          |              |
| <i>Geobacter</i> sp. M21                   | NC_012918 | 354        | no TssH                                                 | A0190    | Ib           |
| <i>Geobacter sulfurreducens</i> KN400      | NC_017454 | 602        | no TssD, TssL, TssI, TssA, TssB, TssC, TssM             | A0193    | IIa          |
|                                            |           | 603        | no TssH, TssE, TssF, TssG, TssJ, TssK                   |          |              |
| <i>Geobacter sulfurreducens</i> PCA        | NC_002939 | 11         | no TssD, TssL, TssI, TssA, TssB, TssC, TssM             | A0194    | IIa          |
|                                            |           | 12         | no TssH, TssE, TssF, TssG, TssJ, TssK                   |          |              |
| <i>Granulicella tundricola</i> MP5ACTX9    | NC_015057 | 506        | no TssJ                                                 | A0011    | IIc          |
| <i>Leptothrix cholodnii</i> SP-6           | NC_010524 | <b>265</b> |                                                         | A0141    | IIb          |
| <i>Mesorhizobium japonicum</i> MAFF 303099 | NC_002678 | <b>7</b>   |                                                         | A0084    | IIa          |
| <i>Methylomicrobium alcaliphilum</i> 20Z   | NC_016112 | 512        | no TssD, TssJ                                           | A0274    | Ib           |
| <i>Methylomonas methanica</i> MC09         | NC_015572 | 443        | no TssL, TssI, TssJ, TssK, TssM                         | A0277    | IIb          |
|                                            |           | 444        | no TssH, TssD, TssI, TssA, TssB, TssC, TssE, TssF, TssG |          |              |

|                                                       |           |            |                                       |       |             |
|-------------------------------------------------------|-----------|------------|---------------------------------------|-------|-------------|
| <i>Myxococcus fulvus</i> HW-1                         | NC_015711 | <u>450</u> |                                       | A0207 | I <b>b</b>  |
| <i>Myxococcus stipitatus</i> DSM 14675                | NC_020126 | 725        | no TssI                               | A0211 | I <b>b</b>  |
|                                                       |           | 797        | no TssD, TssI, TssA, TssJ             | A0212 | I <b>lc</b> |
| <i>Myxococcus xanthus</i> DK 1622                     | NC_008095 | <u>127</u> |                                       | A0213 | I <b>b</b>  |
| <i>Niastella koreensis</i> GR20-10                    | NC_016609 | 923        | no TssM                               | A0050 | I <b>b</b>  |
| <i>Nitrospira defluvii</i>                            | NC_014355 | <u>407</u> |                                       | A0068 | I <b>lc</b> |
| <i>Pelobacter carbinolicus</i> DSM 2380               | NC_007498 | <u>100</u> |                                       | A0215 | I <b>ld</b> |
|                                                       |           | <u>355</u> |                                       | A0281 |             |
| <i>Photorhabdus asymbiotica</i>                       | NC_012962 | <u>356</u> |                                       | A0282 |             |
|                                                       |           | 357        | no TssH, TssA, TssE, TssJ             | A0283 | I <b>a</b>  |
|                                                       |           | <u>358</u> |                                       | A0284 |             |
|                                                       |           |            |                                       | A0285 |             |
|                                                       |           |            |                                       |       |             |
| <i>Photorhabdus luminescens</i> subsp. laumondii TTO1 | NC_005126 | <u>50</u>  |                                       | A0292 |             |
|                                                       |           | <u>51</u>  |                                       | A0293 |             |
|                                                       |           | 52         | no TssH, TssL, TssA                   | A0294 |             |
|                                                       |           | 53         | no TssB                               | A0295 | I <b>a</b>  |
|                                                       |           |            |                                       | A0296 |             |
|                                                       |           |            | A0297                                 |       |             |
| <i>Pseudogulbenkiania</i> sp. NH8B                    | NC_016002 | <u>459</u> |                                       | A0160 | I <b>lc</b> |
| <i>Saccharophagus degradans</i> 2-40                  | NC_007912 | <u>119</u> |                                       | A0315 | I <b>b</b>  |
| <i>Sorangium cellulosum</i> So ce56                   | NC_010162 | 248        | no TssI                               | A0221 | I <b>lc</b> |
|                                                       |           | 249        | no TssH, TssJ                         |       |             |
| <i>Sorangium cellulosum</i> So0157-2                  | NC_021658 | 815        | no TssI                               | A0222 | I <b>b</b>  |
|                                                       |           |            |                                       | A0223 | I <b>lc</b> |
|                                                       |           |            |                                       | A0224 | I <b>b</b>  |
|                                                       |           |            |                                       | A0225 | I <b>lc</b> |
| <i>Stigmatella aurantiaca</i> DW4/3-1                 | NC_014623 | 500        | no TssH, TssD, TssI, TssA, TssG, TssJ | A0226 | I <b>b</b>  |
|                                                       |           |            |                                       | A0229 | I <b>ld</b> |
| <i>Teredinibacter turnerae</i> T7901                  | NC_012997 | <u>359</u> |                                       | A0322 | I <b>b</b>  |

Note: \* (T6SS ID) are available from T6SS database - SecReT6 (Li et al. 2015). Description of T6SS components is available from SecReT6 (<http://db-mml.sjtu.edu.cn/SecReT6/>). Classical T6SS loci containing all essential genes are labeled with underlined T6SS ID number. Most of T6SS loci listed here are lack of several essential T6SS genes. # (eCIS ID) is available from dbECIS.

**Table S6.** A list of plasmid-encoded eCIS-like loci in different bacteria species, related to Figure 3.

| Bacteria                                          | Phylum              | eCIS ID* | Replicon           | GenBank accession | eCIS sub-type |
|---------------------------------------------------|---------------------|----------|--------------------|-------------------|---------------|
| <i>Mycobacterium</i> sp. JS623                    | Actinobacteria      | A0409    | plasmid pMYCSM01   | CP003079          | Iic           |
| <i>Rhodococcus opacus</i> R7                      | Actinobacteria      | A0416    | plasmid pPDG1      | CP008948          | IId           |
| <i>Rhodococcus</i> sp. WB1                        | Actinobacteria      | A0418    | chromosome         | CP015529          | IId           |
|                                                   |                     | A0419    | plasmid pWB1       | CP015530          | Ia            |
| <i>Streptomyces cattleya</i> DSM 46488            | Actinobacteria      | A0445    | plasmid pSCATT     | CP003229          | IId           |
| <i>Streptomyces cattleya</i> DSM 46488            | Actinobacteria      | A0444    | plasmid pSCAT      | FQ859184          | IId           |
| <i>Streptomyces clavuligerus</i> ATCC 27064       | Actinobacteria      | A0449    | chromosome         | CM000913          | I Ib          |
|                                                   |                     | A0450    | plasmid pSCL4      | CM000914          | IId           |
| <i>Streptomyces clavuligerus</i> F613-1           | Actinobacteria      | A0447    | chromosome         | CP016559          | I Ib          |
|                                                   |                     | A0448    | plasmid pSCL4      | CP016560          | IId           |
| <i>Fischerella</i> sp. NIES-4106                  | Cyanobacteria       | A0587    | plasmid plasmid1   | AP018299          | Ia            |
| <i>Nostoc linckia</i> NIES-25                     | Cyanobacteria       | A0606    | plasmid plasmid1   | AP018223          | IId           |
|                                                   |                     | A0605    | plasmid plasmid1   |                   | Ib            |
| <i>Calothrix</i> sp. NIES-2098                    | Cyanobacteria       | A0561    | chromosome         | AP018172          | Ib            |
|                                                   |                     | A0562    |                    |                   | IId           |
|                                                   |                     | A0563    | plasmid plasmid1   |                   | Ia            |
| <i>Calothrix</i> sp. NIES-4101                    | Cyanobacteria       | A0573    | chromosome         | AP018280          | IId           |
|                                                   |                     | A0574    |                    |                   | Ic            |
|                                                   |                     | A0572    | plasmid plasmid1   | AP018274          | IId           |
| <i>Scytonema</i> sp. HK-05 NIES-2130              | Cyanobacteria       | A0627    | plasmid plasmid1   | AP018195          | IId           |
| <i>Deinococcus actinoscleris</i> SJTR             | Deinococcus-Thermus | A0634    | plasmid unnamed3   | CP029777          | IId           |
| <i>Halogeometricum borinquense</i> DSM 11551 PR 3 | Euryarchaeota       | A0001    | plasmid pHBOR03    | CP001693          | Ia            |
| <i>Burkholderia</i> sp. MSMB1588                  | Proteobacteria      | A0128    | chromosome 2       | CM003770          | Ic            |
|                                                   |                     | A0129    | plasmid unnamed 1  | LNJS01000004      | Ia            |
| <i>Paraburkholderia caribensis</i> MBA4           | Proteobacteria      | A0154    | plasmid unnamed    | CP012748          | Ia            |
| <i>Enterobacter roggkampii</i> DSM 16690          | Proteobacteria      | A0259    | plasmid pDSMZ16690 | CP017185          | Ia            |
| <i>Rhodobacter sphaeroides</i> ATCC 17025         | Proteobacteria      | A0091    | plasmid pRSPA03    | CP000664          | I Ib          |
| <i>Rhodovulum</i> sp. MB263                       | Proteobacteria      | A0092    | plasmid pRSMB      | CP020385          | IId           |
| <i>Rhodovulum sulfidophilum</i> DSM 1374          | Proteobacteria      | A0095    | plasmid unnamed1   | CP015419          | IId           |
| <i>Rhodovulum sulfidophilum</i> SNK001            | Proteobacteria      | A0094    | plasmid unnamed    | CP015422          | IId           |
| <i>Azospirillum thiophilum</i> CFH 70021          | Proteobacteria      | A0070    | plasmid unnamed3   | CP029358          | Ib            |
| <i>Novosphingobium resinovorum</i> SA1            | Proteobacteria      | A0087    | plasmid pSA1       | CP017076          | Ic            |
| <i>Serratia entomophila</i> A1M02                 | Proteobacteria      | A0650    | plasmid pADAP      | AF135182          | Ia            |

Note: \* (eCIS ID) is available from dbCIS. Several bacteria species encodes multi-copy eCIS-like loci in both chromosome and plasmid.
